# Supplementary material for: Chitosan-Based Nanogels: Synthesis and Toxicity Profile for Drug Delivery to Articular Joints
Source: MDPI journal article supplement (doi:10.3390/nano12081337), 2022-04-13
Supplement: s1 [file s1]

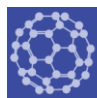

# Chitosan-Based Nanogels: Synthesis and Toxicity Profile for Drug Delivery to Articular Joints

Seng Manivong <sup>1,2</sup>, Araceli Garcia Ac <sup>2</sup>, Shunmoogum A. Patten <sup>3</sup>, Julio C. Fernandes <sup>4</sup>, Mohamed Benderdour <sup>4</sup>, Xavier Banquy <sup>2</sup>, Florina Moldovan <sup>1,5,\*</sup> and Valérie Gaëlle Roullin <sup>2,\*</sup>

<sup>1</sup> Centre de recherche, CHU Sainte-Justine, Montreal, QC H3T 1C5, Canada; seng.manivong@umontreal.ca

<sup>2</sup> Faculté de Pharmacie, Université de Montréal, Montreal, QC H3T 1J4, Canada; araceli.ac.garcia@umontreal.ca (A.G.A.); xavier.banquy@umontreal.ca (X.B.)

<sup>3</sup> Institut national de la recherche scientifique, Centre Armand-Frappier Santé Biotechnologie, Laval, QC H7V 1B7, Canada; kessen.patten@inrs.ca

<sup>4</sup> Centre de recherche, Hôpital du Sacré-Cœur de Montréal, Faculté de Médecine, Université de Montréal, Montreal, QC H4J 1C5 Canada; julio.c.fernandes@umontreal.ca (J.C.F.); mohamed.benderdour@umontreal.ca (M.B.)

<sup>5</sup> Faculté de Médecine Dentaire, Université de Montréal, Montreal, QC H3T 1J4, Canada

\* Correspondence: florina.moldovan@umontreal.ca (F.M.); vg.roullin@umontreal.ca (V.G.R.)

**Table S1.** Detailed list of materials and reagents used in this study.

| Nanogel synthesis & Characterization                                                |                       |                                                    |             |
|-------------------------------------------------------------------------------------|-----------------------|----------------------------------------------------|-------------|
| Item                                                                                | Acronym               | Supplier                                           | Catalogue # |
| Chitosan medium molecular weight, DDA 83.6%, viscosity 460 CPS                      | CS <sub>MMW</sub>     | Sigma-Aldrich, Missouri, USA                       | 44887-7-50G |
| Chitosan low molecular weight, DDA 77%, viscosity 146 CPS                           | CS <sub>LMW</sub>     | Sigma-Aldrich, Missouri, USA                       | 448869-50G  |
| Chitosan low molecular weight (60-120 kDa), high purity DDA 79.1%, viscosity 27 CPS | CS <sub>LMW, HP</sub> | Sigma-Aldrich, Missouri, USA                       | 740063-5G   |
| Citric acid, 99.9% grade                                                            | CA                    | Fisher Chemical, Thermo Fisher Scientific, MA, USA | A940-500    |
| Acetic acid, 100% grade                                                             | AA                    | Fisher Chemical, Thermo Fisher Scientific, MA, USA | A940-212    |
| Hyaluronic acid, research grade                                                     | HA1500K               | LifeCore Biomedical LLC, Minnesota, USA            | HA1500K     |
| Hyaluronic acid, research grade                                                     | HA500K                | LifeCore Biomedical LLC, Minnesota, USA            | HA500K      |
| Hyaluronic acid, research grade                                                     | HA60K                 | LifeCore Biomedical LLC, Minnesota, USA            | HA60K       |
| Hyaluronic acid, research grade                                                     | HA10K                 | LifeCore Biomedical LLC, Minnesota, USA            | HA10K-1     |
| Sodium TriPolyPhosphate                                                             | TPP                   | Alfa Aesar, MA, USA                                | 13440-36    |
| Sucrose 99+%                                                                        | Sucrose               | Sigma-Aldrich, Missouri, USA                       | 179949-500G |
| Ultrapure water                                                                     | –                     | Arium® Pro Ultrapure Water Sytem                   |             |
| Cell Culture & in vitro Assays                                                      |                       |                                                    |             |
| Item                                                                                | Acronym               | Supplier                                           | Catalogue # |
| DMEM                                                                                | DMEM                  | WISSENT Inc, QC, Canada                            | 319-165-CL  |
| DMEM phenol red                                                                     | DMEM                  | WISSENT Inc, QC, Canada                            | 319-005-CL  |
| DMEM/F12                                                                            | DMEM/F12              | WISSENT Inc, QC, Canada                            | 319-081-CL  |
| DMEM/F12 phenol red                                                                 | DMEM/F12              | WISSENT Inc, QC, Canada                            | 319-075-CL  |
| Phosphate Buffer Saline                                                             | PBS                   | Fisher BioReagents                                 | BP3994      |
| Penicilline-Streptomycine-Glutamine                                                 | PSG                   | Gibco                                              | LS10378016  |
| Trypsine-EDTA                                                                       |                       | Invitrogen, Carlsbad, CA, USA                      | 25200072    |
| Fetal Bovine Serum                                                                  | FBS                   | WISSENT Inc, QC, Canada                            | 098-150     |
| Triton X-100 BioXtra                                                                |                       | Sigma-Aldrich, Missouri, USA                       | T9284-500mL |
| MTS Reagent                                                                         | MTS                   | Abcam plc. MA, USA                                 | ab197010    |
| LDH                                                                                 |                       | Home made                                          |             |
| Iodonitrotetrazolium chloride                                                       | –                     | Sigma-Aldrich, Missouri, USA                       | I8377       |
| Phenazine methosulfate                                                              | –                     | Santa Cruz Biotechnology, Inc., Texas, USA         | sc-215700   |
| B-nicotinamide adenine dinucleotide sodium salt                                     | –                     | Sigma-Aldrich, Missouri, USA                       | N0632       |
| Lithium lactate                                                                     | –                     | Sigma-Aldrich, Missouri, USA                       | 440469      |
| Tris base                                                                           | –                     | Santa Cruz Biotechnology, Inc., Texas, USA         | sc-3715A    |
| Nitric Oxid dosage                                                                  | NO                    | Home made                                          |             |
| N-(1-naphtyl)ethyl-enediamine                                                       | –                     | Sigma-Aldrich, Missouri, USA                       | N-9125      |
| Sulfanilamide                                                                       | –                     | Sigma-Aldrich, Missouri, USA                       | S-9251      |
| Sodium nitrite                                                                      | –                     | Sigma-Aldrich, Missouri, USA                       | 237213-100G |
| Phosphoric acid                                                                     | –                     | Sigma-Aldrich, Missouri, USA                       | P-6560      |
| DNA fragmentation                                                                   |                       |                                                    |             |
| PureLink™ Genomic DNA minikit                                                       | –                     | Invitrogen, Carlsbad, CA, USA                      | K182002     |
| Ultrapure Agarose                                                                   | –                     | Invitrogen, Carlsbad, CA, USA                      | 16500-500   |

|                            |                |                                                     |                    |
|----------------------------|----------------|-----------------------------------------------------|--------------------|
| SafeView™ Classic          | –              | Applied Biological Materials Inc. (abm), BC, Canada | G108               |
| 1 kb DNA Ladder RTU        | –              | FroggaBio, ON, Canada                               | DM010-R500         |
| <b>In vivo Experiments</b> |                |                                                     |                    |
| <b>Item</b>                | <b>Acronym</b> | <b>Supplier</b>                                     | <b>Catalogue #</b> |
| Adult zebrafish medium     | –              | Tap water                                           |                    |
| Embryo zebrafish medium    | –              | Tap water with methylene blue                       |                    |

**Table S2.** Detailed list of Consumables and Equipment used in this study.

|                                                 |                |                                                      |                    |
|-------------------------------------------------|----------------|------------------------------------------------------|--------------------|
| <b>Nanogel synthesis &amp; Characterization</b> |                |                                                      |                    |
| <b>Item</b>                                     | <b>Acronym</b> | <b>Supplier</b>                                      | <b>Catalogue #</b> |
| Ultrasonic system Sonic Dismembrator 550        | US             | Fisher scientific, Thermo Fisher Scientific, MA, USA |                    |
| Ultrasonic system Sonic Dismembrator 550 probe  | –              | Fisher scientific, Thermo Fisher Scientific, MA, USA | FB4406             |
| Syringe filter 5 µm Versapor® Membrane, sterile | –              | PALL Corporation, Ontario, Canada                    | 6094184            |
| Syringe filter 0.45 µm Nylon, sterile           | –              | Fisher scientific, Thermo Fisher Scientific, MA, USA | 13-1001-01         |
| Syringe filter 0.20 µm Nylon, sterile           | –              | Fisher scientific, Thermo Fisher Scientific, MA, USA | 13-1001-00         |
| 10 mL BD Luer-Lok™ Syringe, sterile             | –              | BD, Becton Dickinson and Company., NJ, USA           | 309644             |
| BD PrecisionGlide™ Needle 25 g x 1 ½            | –              | BD, Becton, Dickinson and Company., NJ, USA          | 305127             |
| Syringe pump, KDS-200                           | –              | Kd Scientific, Holliston, MA, USA                    | 78-0200            |
| Magnetic stirrer HI 200M                        | –              | Hanna Instruments, RI, USA                           | HI200M-1           |
| Spectra/Por® Dialysis membrane 6.0, MWCO 25 kD  | –              | Spectrum™ Chemical Manufacturing Corp., NJ, USA      | 132552             |
| Nanobrook Omni                                  | –              | Brookhaven Instruments, NY, USA                      |                    |
| Centrifuge 5415R                                | –              | Eppendorf AG, Ontario, Canada                        | 5415 R             |
| Microprocessor pH meter                         | –              | Hanna Instruments, RI, USA                           | pH 211             |
| <b>Cell Culture &amp; in vitro Assays</b>       |                |                                                      |                    |
| <b>Item</b>                                     | <b>Acronym</b> | <b>Supplier</b>                                      | <b>Catalogue #</b> |
| TC Flask T25, Cell+, Vented Cap                 | –              | SARSTEDT AG & Co. KG, Nümbrecht, Germany             | 83.3910.302        |
| TC Flask T75, Cell+, Vented Cap                 | –              | SARSTEDT AG & Co. KG, Nümbrecht, Germany             | 83.3911.302        |
| TC Flask T75, Stand., Vent. Cap                 | –              | SARSTEDT AG & Co. KG, Nümbrecht, Germany             | 83.3911.002        |
| 6-well plate                                    | –              | CELLTREAT Scientific Products, MA, USA               | 229105             |
| 12-well plate                                   | –              | CELLTREAT Scientific Products, MA, USA               | 229111             |
| 96-well plate                                   | –              | CELLTREAT Scientific Products, MA, USA               | 229195             |
| Sterile Serological Pipets, 5mL                 |                | Fisher scientific, Thermo Fisher Scientific, MA, USA | 13-678-11D         |
| Sterile Serological Pipets, 10mL                | –              | Greiner Bio-One GmbH                                 | 607 180            |
| Sterile Serological pipette, 25mL               |                | CELLTREAT Scientific Products, MA, USA               | 229025B            |

| Microcentrifuges tubes 1.5mL                 | –       | Ultident Scientific Inc., QC, Canada   | 87-B150-C   |
|----------------------------------------------|---------|----------------------------------------|-------------|
| CLARIOstar <sup>plus</sup> microplate reader | –       | BMG LABTECH GmbH, Ortenberg, Germany   |             |
| PowerPac <sup>TM</sup> Basic Power Supply    | –       | Bio-Rad, Hercules, CA, USA             | 1645050     |
| ChemiDoc Imaging System                      | –       | Bio-Rad, Hercules, CA, USA             |             |
| Image Lab software (version 6.1)             | –       | Bio-Rad, Hercules, CA, USA             |             |
| In vivo Experiments                          |         |                                        |             |
| Item                                         | Acronym | Supplier                               | Catalogue # |
| 6-well plate                                 | –       | CELLTREAT Scientific Products, MA, USA | 229105      |
| Nikon SMZ660 microscope                      | –       | Nikon Instruments Inc., NY, USA        |             |
| EVOS M5000 Imaging System                    | –       | Thermo Fisher Scientific, MA, USA      | AMF5000     |

Table S3. Influence of the cryoprotective agent nature on the mean size &amp; PDI of purified NG.

| [cryoprotective agent] %w/v |    | Blank NG        |                 |
|-----------------------------|----|-----------------|-----------------|
|                             |    | $S_f/S_i$       | $PDI_f/PDI_i$   |
| Trehalose                   | 5  | $1.79 \pm 0.20$ | $1.70 \pm 1.29$ |
|                             | 10 | $1.83 \pm 1.14$ | $1.15 \pm 0.65$ |
|                             | 20 | $1.16 \pm 0.02$ | $0.83 \pm 0.03$ |
| Sucrose                     | 5  | $1.52 \pm 0.12$ | $1.24 \pm 0.36$ |
|                             | 8  | $1.11 \pm 0.05$ | $1.06 \pm 0.04$ |
|                             | 10 | $1.00 \pm 0.03$ | $0.87 \pm 0.19$ |
| Glucose                     | 20 | $0.97 \pm 0.00$ | $0.57 \pm 0.03$ |
|                             | 5  | $2.36 \pm 0.67$ | $1.87 \pm 0.52$ |
|                             | 10 | $1.15 \pm 0.05$ | $1.14 \pm 0.35$ |
| Lactose                     | 20 | $1.01 \pm 0.02$ | $0.88 \pm 0.09$ |
|                             | 5  | $1.40 \pm 0.03$ | $1.21 \pm 0.23$ |
|                             | 10 | $1.30 \pm 0.29$ | $1.22 \pm 0.18$ |
| LMW dextran                 | 20 | $2.03 \pm 1.02$ | $2.40 \pm 1.30$ |
|                             | 5  | $1.12 \pm 0.14$ | $1.21 \pm 0.52$ |
|                             | 10 | $0.66 \pm 0.59$ | Not dispersible |
|                             | 20 | $1.12 \pm 0.14$ | $1.03 \pm 0.01$ |

Results are expressed in ratios final size after lyophilization / initial size before lyophilization ( $S_f/S_i$ ) and final PDI after lyophilization / initial PDI before lyophilization ( $PDI_f/PDI_i$ ).  $n = 3$  batches, 3 measurements / batch.

Table S4. Physicochemical characteristics of nanogels depending on CH solubilization medium.

|                     | [acid], %<br>w/v | N* | Size (nm)     | PdI             | Z-Potential (mV) | pH**  |       |
|---------------------|------------------|----|---------------|-----------------|------------------|-------|-------|
|                     |                  |    | mean $\pm$ SD | mean $\pm$ SD   | mean $\pm$ SD    | prior | after |
| Citric acid<br>(CA) | 3                | 3  | $206 \pm 33$  | $0.33 \pm 0.09$ | $37.0 \pm 1.4$   | 2.4   | 3.5   |
|                     | 5                | 3  | $237 \pm 15$  | $0.37 \pm 0.10$ | $37.6 \pm 2.1$   | 2.2   | 3.2   |
|                     | 10               | 15 | $267 \pm 9$   | $0.24 \pm 0.02$ | $37.4 \pm 10.1$  | 1.3   | 1.9   |
| Acetic acid<br>(AA) | 1                | 9  | $310 \pm 6$   | $0.44 \pm 0.04$ | $41.7 \pm 1.9$   | 2.6   | 3.6   |
|                     | 1.5              | 6  | $508 \pm 24$  | $0.51 \pm 0.08$ | $47.3 \pm 1.5$   | 2.7   | 3.4   |
|                     | 2                | 9  | $304 \pm 21$  | $0.38 \pm 0.04$ | $52.1 \pm 0.9$   | 1.9   | 3.3   |

\* N = number of batches  $\times$  3 measurements per batch

\*\* prior synthesis (CH-based solution) and after synthesis (NG raw suspension); average values of 2-3 measurements.

**Table S5.** Nitrite production of chondrocytes, synoviocytes and osteoblasts treated with NG CH-AA2 (A) and NG CH-CA10 (B) for 72 hours.

| A            |                       |  |  | NG CH-AA2 (µg·mL <sup>-1</sup> ) |   |     |        |   |     |         |   |     |        |   |     |        |   |     |        |   |     |        |   |     |        |   |     |
|--------------|-----------------------|--|--|----------------------------------|---|-----|--------|---|-----|---------|---|-----|--------|---|-----|--------|---|-----|--------|---|-----|--------|---|-----|--------|---|-----|
|              |                       |  |  | 0                                |   |     | 12,5   |   |     | 25      |   |     | 50     |   |     | 100    |   |     | 200    |   |     | 400    |   |     | C+     |   |     |
| Chondrocytes | [NO] (µM) (mean ± SD) |  |  | 0.2                              | ± | 0.4 | −0.2   | ± | 0.6 | −0.2    | ± | 1.1 | 0.3    | ± | 0.7 | 1.0    | ± | 1.7 | −0.1   | ± | 1.0 | 0.6    | ± | 1.6 | −0.5   | ± | 0.4 |
|              | Adjusted P- value     |  |  |                                  |   |     | 0.9994 |   |     | 0.9995  |   |     | 0.9999 |   |     | 0.9511 |   |     | 0.9997 |   |     | 0.9994 |   |     | 0.9808 |   |     |
| Synoviocytes | [NO] (µM) (mean ± SD) |  |  | −0.2                             | ± | 0.2 | −0.5   | ± | 0.2 | −0.5    | ± | 0.4 | −0.5   | ± | 0.2 | −0.6   | ± | 0.2 | −0.8   | ± | 0.4 | −0.6   | ± | 0.5 | −0.5   | ± | 0.3 |
|              | Adjusted P- value     |  |  |                                  |   |     | 0.8746 |   |     | 0.7989  |   |     | 0.7565 |   |     | 0.4873 |   |     | 0.1608 |   |     | 0.6262 |   |     | 0.7507 |   |     |
| Osteoblasts  | [NO] (µM) (mean ± SD) |  |  | −0.3                             | ± | 0.9 | −0.5   | ± | 0.4 | −0.5    | ± | 0.2 | −1.0   | ± | 0.2 | −0.8   | ± | 0.2 | −0.8   | ± | 0.6 | −0.8   | ± | 0.4 | −0.6   | ± | 0.1 |
|              | Adjusted P- value     |  |  |                                  |   |     | 0,9774 |   |     | 0,9943  |   |     | 0,2676 |   |     | 0,5934 |   |     | 0,635  |   |     | 0,5771 |   |     | 0,8738 |   |     |
| B            |                       |  |  | NG CH-CA10 (µ·mL <sup>-1</sup> ) |   |     |        |   |     |         |   |     |        |   |     |        |   |     |        |   |     |        |   |     |        |   |     |
|              |                       |  |  | 0                                |   |     | 12,5   |   |     | 25      |   |     | 50     |   |     | 100    |   |     | 200    |   |     | 400    |   |     | C+     |   |     |
| Chondrocytes | [NO] (µM) (mean ± SD) |  |  | 0.2                              | ± | 0.4 | 1.7    | ± | 0.1 | 0.7     | ± | 0.7 | 0.6    | ± | 0.6 | 1.2    | ± | 1.3 | 2.6    | ± | 0.6 | 0.7    | ± | 0.4 | −0.5   | ± | 0.4 |
|              | Adjusted P- value     |  |  |                                  |   |     | 0.1756 |   |     | 0.9404  |   |     | 0.9695 |   |     | 0.4979 |   |     | 0.0303 |   |     | 0.938  |   |     | 0.8515 |   |     |
| Synoviocytes | [NO] (µM) (mean ± SD) |  |  | −0.2                             | ± | 0.2 | 0.0    | ± | 0.6 | −0.2    | ± | 0.4 | −0.5   | ± | 0.3 | −0.5   | ± | 0.3 | −0.7   | ± | 0.2 | −0.5   | ± | 0.1 | −0.5   | ± | 0.3 |
|              | Adjusted P- value     |  |  |                                  |   |     | 0.9433 |   |     | >0.9999 |   |     | 0.8331 |   |     | 0.8115 |   |     | 0.4422 |   |     | 0.9117 |   |     | 0.7712 |   |     |
| Osteoblasts  | [NO] (µM) (mean ± SD) |  |  | −0.3                             | ± | 0.9 | −0.5   | ± | 0.8 | −0.7    | ± | 0.2 | −0.9   | ± | 0.2 | −0.9   | ± | 0.2 | −0.7   | ± | 0.2 | −0.6   | ± | 0.5 | −0.6   | ± | 0.1 |
|              | Adjusted P- value     |  |  |                                  |   |     | 0.9953 |   |     | 0.7546  |   |     | 0.5073 |   |     | 0.488  |   |     | 0.7892 |   |     | 0.9315 |   |     | 0.9082 |   |     |

Nitrite production was measured in the culture supernatant using a spectrophotometric method based on the Griess reaction. Absorbance was measured at 540 nm and nitrite concentration was determined using a standard solution of  $\text{NaNO}_2$ .  $n = 3$  independent experiments for each dose and formula in quadruplets. One-way ANOVA analyses with Dunnett's multiple comparisons tests were performed with GraphPad Prism 9.0.0.

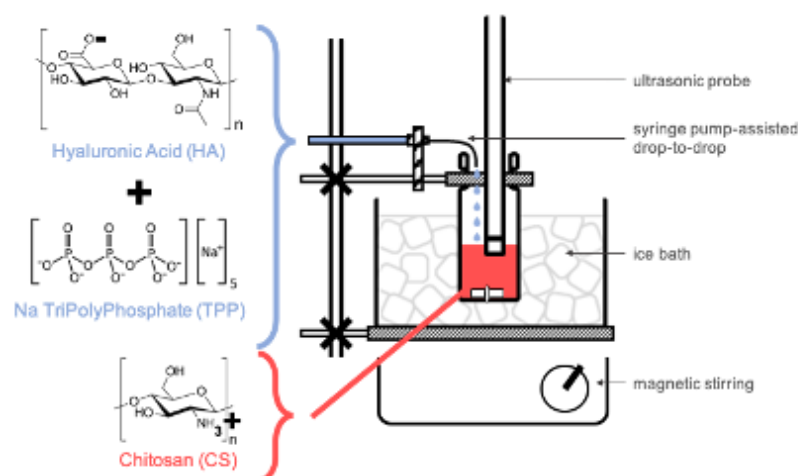

**Figure S1.** Schematic representation of the technical setup used to synthesize chitosan-based nanogels.

The anionic HA/TPP aqueous solution (1 vol.) is added dropwise ( $75 \mu\text{L}\cdot\text{s}^{-1}$ ) to the cationic CS solution (2 vol.) under both moderate magnetic stirring and ultrasonic agitation. The ultrasound system consists in a Sonic Dismembrator ultrasound generator, set at power 3 out 12, equipped with a 0.5-in ultrasonic probe. The resulting solution (3 vol.) is left an additional 60 s under dual agitation, then ultrasounds are stopped and the colloidal solution is left 10 min under the sole magnetic stirring to strengthen the nanogel formation.

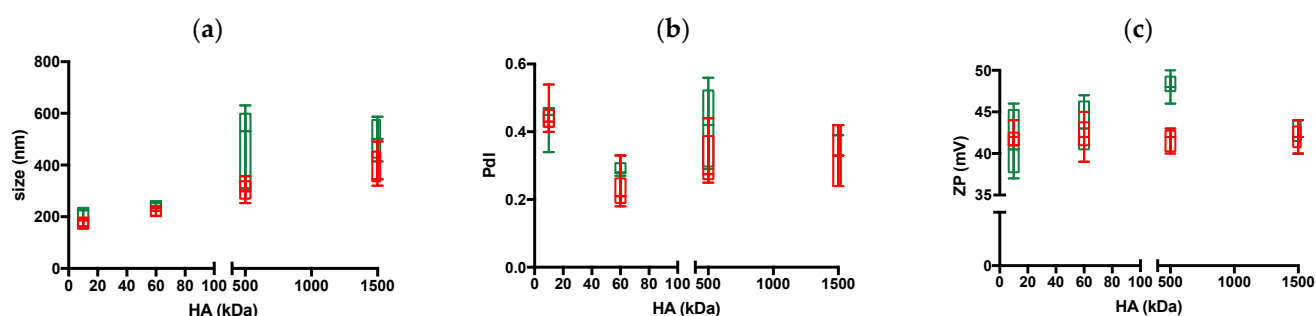

**Figure S2.** Mean sizes (a), PDI (b) and zeta potentials (c) of chitosan-based nanogels, prepared by ionic gelation depending on chitosan and hyaluronic acid molecular weights. Red: low molecular weight chitosan (50-190 kDa, DDA = 77.0 %); green: medium molecular weight chitosan (190-310 kDa, DDA = 83.6%).

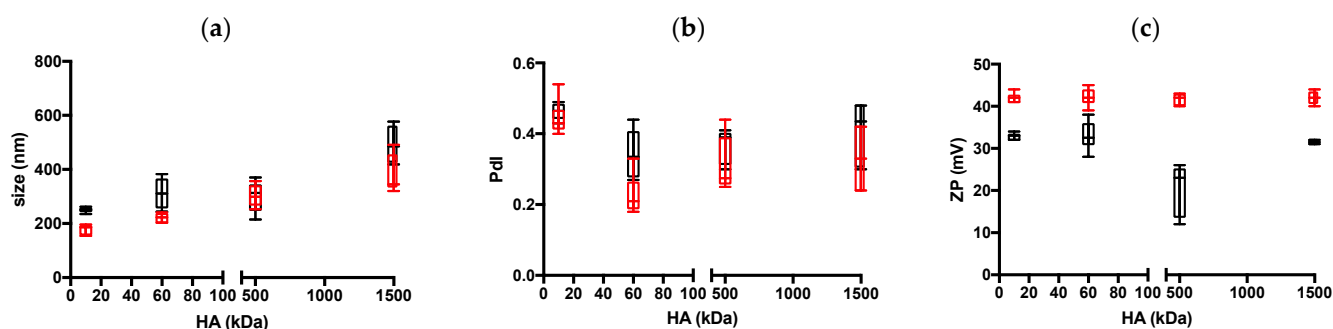

**Figure S3.** Mean sizes (a), PDI (b) and zeta potentials (c) of chitosan-based nanogels, prepared by ionic gelation with low molecular weight chitosan, prior (red) and after (black) dialysis purification.

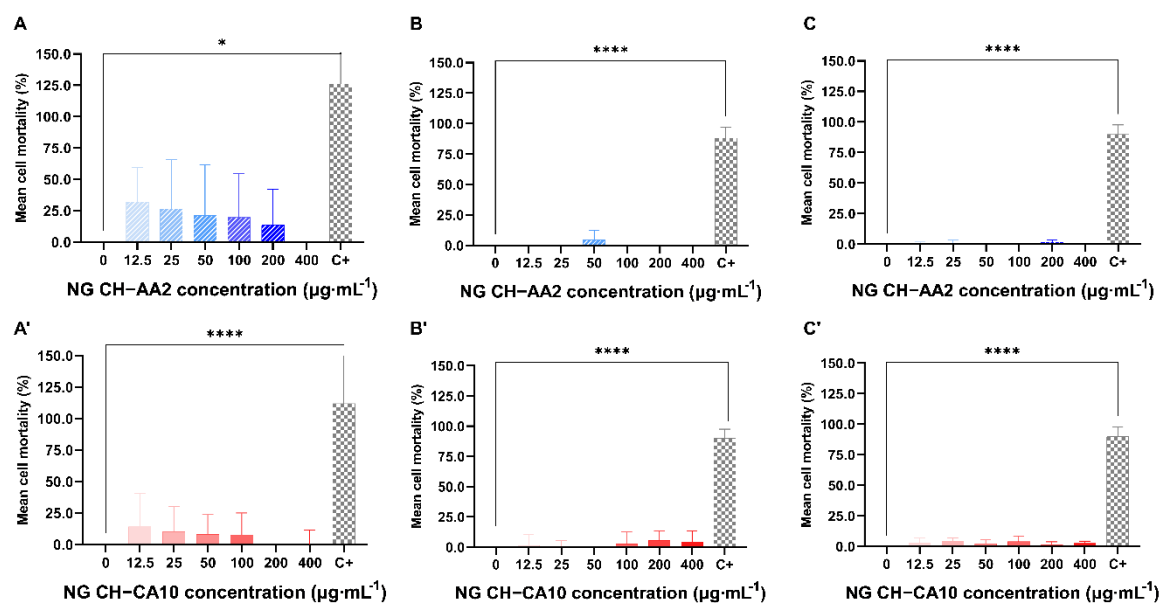

**Figure S4.** Relative mortality of chondrocytes (A,A'), synoviocytes (B,B') and osteoblasts (C,C') treated with NG CH-AA2 (A,B,C in striped blue) and NG CH-CA10 (A',B',C' in full red) for 72 h. Mortality was assessed by LDH assay and was calculated as follow: % mortality =  $[(OD_{sample} - OD_{negative\ control}) / OD_{positive\ control}] \times 100$   $n = 3$  independent experiments for each dose and formula in quadruplets. One-way ANOVA analyses with Dunnett's multiple comparisons tests were performed with GraphPad Prism 9.0.0. \*  $p < 0.05$ . \*\*\*\*  $p < 0.0001$ .

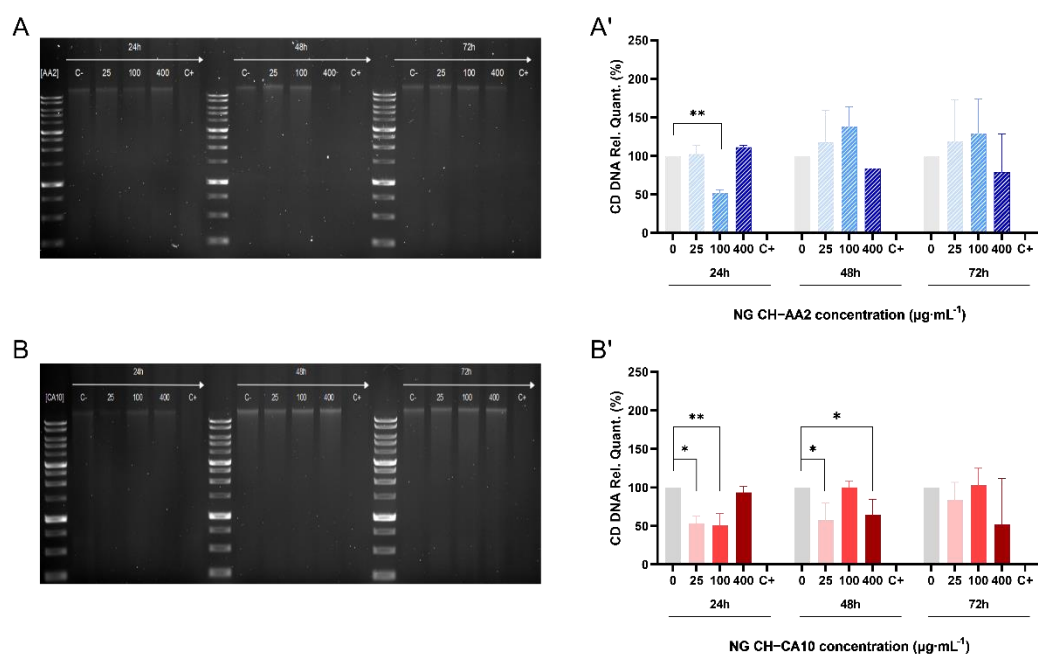

**Figure S5.** DNA degradation of chondrocytes treated with NG for 24 h, 48 h and 72 h. 100 ng of DNA were loaded into a 1.0% agarose gel when chondrocytes were treated with NG CH-AA2 (A) and NG CH-CA10 (B). DNA relative quantification of chondrocytes treated with NG CH-AA2 (A') and NG CH-CA10 (B') was performed using negative control bands as reference (Image Lab 6.1 Software, Bio-Rad). Experiments were performed twice for each formula and each dose. One-way ANOVA analyses with Dunnett's multiple comparisons tests were performed with GraphPad Prism 9.0.0. \*  $p < 0.05$ . \*\*  $p < 0.01$ .

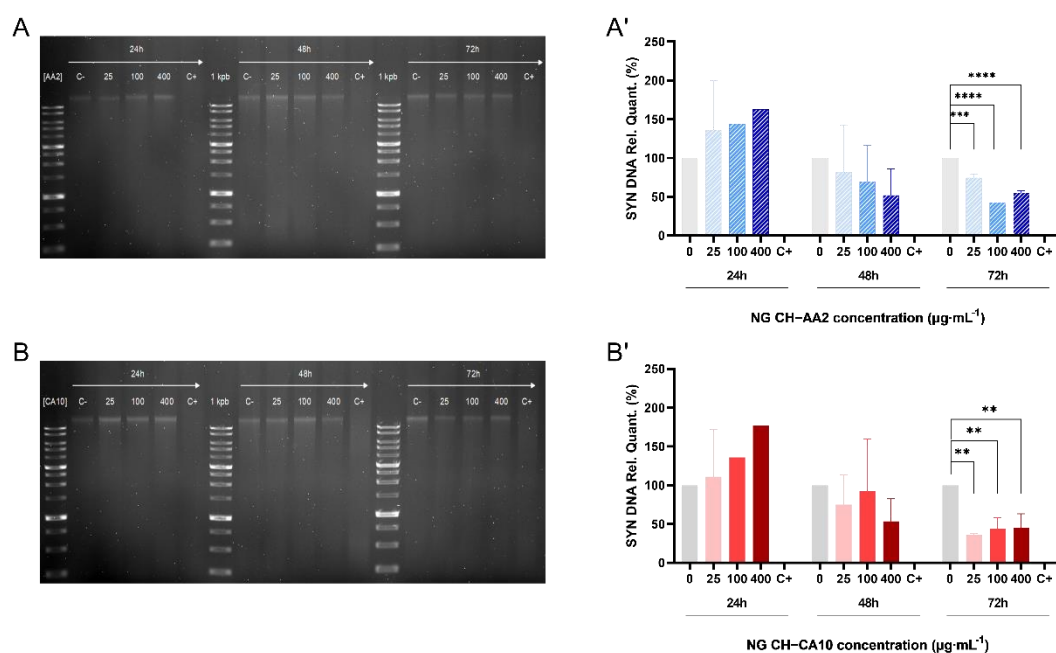

**Figure S6.** DNA degradation of synoviocytes treated with NG for 24 h, 48 h and 72 h. 100 ng of DNA were loaded into an 1.0% agarose gel when synoviocytes were treated with NG CH-AA2 (**A**) and NG CH-CA10 (**B**). DNA relative quantification of synoviocytes treated with NG CH-AA2 (**A'**) and NG CH-CA10 (**B'**) was performed using negative control bands as reference (Image Lab 6.1 Software, Bio-Rad). Experiments were performed twice for each formula and each dose. One-way ANOVA analyses with Dunnett's multiple comparisons tests were performed with GraphPad Prism 9.0.0. \*\*  $p < 0.01$ . \*\*\*  $p < 0.001$ . \*\*\*\*  $p < 0.0001$ .
